# Supplementary material for: The functional microbiome of arthropods
Source: PLoS One. 2017 May 5;12(5):e0176573. doi: 10.1371/journal.pone.0176573 (PMC5419562; doi:10.1371/journal.pone.0176573)
Supplement: S1 Table — The list is extended to the taxae that are present in at least two microbiomes of arthropods. The only exception is Gilliamella, because this anaerobic gamma proteobacterium dominates the gut microbiomes of bees [18,22]. The last column shows the taxa that have been reported to be common contaminants of kits and reagents [52,53]. The numbers OTU classified under a given taxon (generally at the genus level, but also at higher taxonomic levels) are indicated in each column; when rendered in bold, such numbers indicate high levels of relative abundance, after applying threshold values as described in the Methods section. Organisms highlighted in orange contain either RQ or MQ and are not listed in Figs 1–4. %, organism for which only a few protein sequences (generally below 200) are currently available in NCBI websites (https://www.ncbi.nlm.nih.gov/protein, accessed 26 November 2016). (XLSX) [file pone.0176573.s002.xlsx]

## Sheet: Hoja1
class, order, family		scorpion gut	prawn	6 tiger shrimps	10 ticks	honeybee eggs, larvae	Drosophila eggs etc.	1 cockcroach gut, diff. diets	6 cockroaches gut	wood feeding cockroaches	2 cockroaches gut	6 termite gut parts	Atta ants and nests	ants and nests 35 samples	7 ants only	lion ant whole body	16 fleas, 2 species	2 red palm beetles	4 herbivore beetles	contaminants of kits and reagents
	reference	12	17	23	13	22	19	21	20	32	14	16	29	26	26	27	28	24	31	50,51
														taxon per sum
alpha	genus/taxon
Rhizobiales	Bartonella				9	5							1	1
	Brucella			5	6			1		1		1	1
	Ochrobactrum	2	1		1		2	4	3	1		3	1	3	1	1				1
	Agrobacterium				6							1	1	4	1		7	1	1
	Sinorhizobium				2								1	2 per 2, 2	1
	Rhizobium	3	1		7	3			2		1	2	1	2 per 3, 7	1	1		1	1	1
	Mesorhizobium	1	1	1	5			1		2	3	5		1 per 2, 3						1
	Methylobacterium	2	6	5	4	4	2					1	1	4	1	2	5			2
	Devosia	1		1		2		3	2	2		1		5			1	1	1	1
	Hyphomicrobium		3			1	3				1	2		1 per 3, 2 per 2			1	1
	Hyphomicrobiaceae uncul.			2				1		1		4							1
	Blastochloris						1							1 per 2, 1
	Xanthobacteraceae uncul.			1					5	2	3	4	1	4			1		1
	Ancylobacter								1			1		0
	Hoeflea				1									1
	Liberibacter				3							1
	Beijerinckia				3		1	1 uncul.		4		2	1	2			3 uncul.			1
	Microvirga (Balneimonas)					2			1			2		2 per 2	1		5	1
	Kaistia						1			1		1		2				1
	Methylocystis						2			1		2		2 per 2
	Methylocapsa						1					0		2 per 2
	Pleomorphomonas						1				1							1
	Rhodoplanes						1			1	1	1		2 per 2, 2			6	1	1
	Phyllobacterium						1	1	1		3	1				1				1
	Rhizobiaceae uncul.							3		6	3	1		1 per 2, 1	1		3
	Methylocystaceae uncul.							1		1		3		1	1		4
	Chelatococcus							1		1		1		2
	Methylobacteraceae uncul.								5			2		1		1	1
	Rhodomicrobium									1	1	1		1 per 3, 1 per 2
	Methylocella									1	1	1	1	1
	Methylophila									1		1		2				1		0
	Phyllobacteriaciae uncul.									1		2			1		1		1
	Aurantimonas											3		3			1, uncul		1	0
	Methylosinus											1		2					1
	Aminobacter											1		1 per 3, 1	1
	Pedomicrobium%											1						1
	Parvibaculum				1								1	2				1
	Pseudolabrys									1	2	1
	Labrys									1		2		1 per 2, 4
	Rhodobium% MQ									1		1		1 per 2
	Pseudaminobacter								1			1						1
Bradyrhizobiaceae	Rhodoblastus RQ											1		2
	Blastobacter%								4	1		1
	Bradyrhizobiaceae uncul.							2	6	3		3		1			6		1
	Oligotropha				1								1	2
	Nitrobacter				1		1		1			1		1
	Rhodopseudomonas				1		1					1	1	2
	Afipia					2	1			2		2		2 per 2						0
	alpha uncultivated			3				1		2		8		1 per 3, 1		1				1
	Rhizobiales, unclassified			6			1	2	5	4		8		1 per 3, 1		1			1
	Bradyrhizobium		1	2	3			4		4	2	4	1	2 per 3, 1	1			1		2
	Bosea		1	1			1	2	2	1				2		1	1		1	1
	Albibacter	1												0
Rhodobacterales	Paracoccus		2	1	2	2	1	1	1	2	1	2	1	2		2	3	1	1	1
	Rhodobacter		2	2	4		1			1		1	1	3				1	1
	Rhodobacteraceae uncul.			6				1	1		9	7		2			1		1
	Loktanella			1							2	1						1
	Ruegeria			1	1							1	1							1
	Roseovarius			3	2						5	1
	Jannaschia			1	1								1
	Phaeobacter			3								1
	Thalassobius			3								1
	Labrenzia			2								1
	Donghicola			1							1
	Roseibacterium			3							1
	Oceanicola			3							4
	Rhodovulum				1		1
	Sulfitobacter				11							2
	Roseobacter				6							1	1	1
	Dinoroseobacter				2						1		1
	Rubellimicrobium					2						1		1		1	1		1	1
	Shinella									1				1		1		1
	Defluvibacter													2				1
	Amaricoccus						1					1		1				1	1
	Pseudorhodobacter						1							1
	Maricaulis				2								1	2
	Hyphomonas			1	3							2	1	1			1, uncul.
Caulobacterales	Caulobacter			3	2			1	2			1	1	1 per 2, 2		1				1
	Altererythrobacter			1			1					1		3
	Erythrobacter		1	2	2								1	2
	Brevundimonas	1	3	3			1	1		1		1		1 per 2, 4	1	1		1	1	1
	Phenylobacterium		2	3			3			1		1	1	3				1	1
	Asticcacaulis		1							1	2	1		0				1		1
	Caulobacteraceae uncul.							2	1	5		4		2					2
Sphingomonadales	Erythrobacteraceae uncul.											3		1					1
	Porphyrobacter						1					1		2	1
	Kaistobacter					2								3			16		1
	Erythromicrobium		1															1
	Sphingopyxis		3		1		2	1				3	1	3				1		1
	Sphingomonas		7	6		2	5	1	1	3	2	4	1	1 per 3, 1 per 2, 6		1	10	1	1	1
	Novosphingonium		1	1	1	3	2			1	1	2	1	1 per 2, 5		1		1	1	1
	Sphingobium		1	3		4		1		1		1	1	2	1	1	11, washed	1	1	1
Rhodospirillales	Reyranella	1					1							2
	Tistrella						1							2 per 2
	Marispirillum							1		1		1
	Thalassospira							1	5	1	15	2						1
	Rhodospirillaceae uncul.			3				3	5	5	6	9		2 per 2	1		4
	Magnetospirillum				1								1	0				1
	Rhodospirillum				1								1	1
	Phaeospirillum						1							1				1
	Gluconobacter		1		2	3							1	1 per 2, 4	1			1	1
	Roseomonas		6			2	2					1		1 per 2, 1		1	9	1	1	1
	Azospirillum				1		1		1		1	1	1	3		1	1	1
	Acetobacter				1		17	1				1		4				1	1
	Gluconacetobacter				3		1				5	1	1					1	1
	Granulibacter				3							0	1	1
	Saccharibacter					12								0
	Acetobacteraceae uncul.					8		1	2	4		4					11		2
	Acidocella					2		1		1		0		0
	Acidiphilium									1		1	1	0
	Acidicaldus%							1		1		1
	Acidisoma%									1		1		0
	Acidisphaera									1		1		2
	Ameyamaea%									1		0		1
	Rhodopila% RQ & MQ									1		1		0
	Rhodovibrio MQ										1			1
	Para & Craurococcus											2		2						1
	Stella											0		0
	Swaminathania%													1				1
	Tanticharoenia													1				1
	Asaia													3
	Roseococccus%											1		1
	Rhodocista%											1		1 per 2, 1
	Nisaea											1		0
	Defluviicoccus%											1		0
	Skermanella										1	1					2
	Inquilinus											1		3				1
	Enhydrobacter									1				1		1	12	1	1	1
Pelagibacterales	Pelagibacterales uncult.				6							2							1	0
Rickettsiales	Wolbachia				10		1	1				1	1	0	1		very many
	Rickettsia				23		1			1		1	1	2	1	1	2
	Anaplasma				10								1	1
	Ehrlichia				10							1
	Rickettsiales uncul.							1	2	4	1	2		3
	Holospora											1		1			many
	Odyssella									1		1		1
class, order, family		scorpion gut	prawn	6 tiger shrimp	10 ticks	honeybee egg, larvae	Drosophila	1 cockroach, gut, diff. diets	6 cockroaches gut	wood feeding cockroaches	2 cockroaches gut	termite gut, many	Atta ants and nests	ants 35 samples	7 ants only	lion ant whole body	16 fleas, 2 species	2 red palm beetle	herbivore beetles	contaminants of kits and reagents
gamma	genus/taxon
Enterobacterales	Wigglesworthia				7								1
	Enterobacteraceae various			3		3		3	6	3		3	2	1 per 2, 1	2	2	7		2
	Serratia		1	2	4				2			1	1	1 per 3, 1 per 2, 3				1	1	0
	Yersinia		1									1	1	0					1
	Klebsiella	1				3			4			1	1	1 per 2, 4	1					1
	Enterobacter				5				9			2	1	1 per 3, 1 per 2, 7	1			1		1
	Escherichia			2	10	2			3		1	1	1	1 per 3, 1 per 2, 2	1			1		1
	Shigella			2	2	2						1	1	2 per 2, 2	1					0
	Pantoea					1	1		4		1	1	1	4 per 3, 1 per 2, 4	1	1
	Salmonella				10							1	1	4
	Pectobacterium				10								1	1 per 3, 3	1
	Citrobacter				1								1	1 per 2, 3	1
	Rahnella				2							1		1
	Hafnia				6				1					0
	Providencia				10									1
	Edwardsiella				1								1
	Xenorhabdus				10			1		1		0	1
	Tatumella					1			3				1	3	1
	Pragia							1		1	1
	Buchnera							1					1
	Cronobacter								2					1 per 2, 4	1	1
	Cedecea										1	1		0
	Raoultella											0		2	1
	Kluyvera											1		1 per 2, 5	1
	Erwinia													1 per 3, 2 per 2, 5	1			1	1
	Trabulsiella													0				1	1
	Morganella															1		1
Pasteurellales	Pasteurellales various											3		0					1
	Haemophilus			1			1					3	1	2		1		1		1
	Pasteurella			1	6									2			46, uncul.
	Actinobacillus				8							1		1
	Aggregatibacter				5		1							0
Vibrionales	Aliivibrio				7								1
	Photobacterium			6			1						1	1
	Vibrionaceae uncul.			6								1		1			5
	Vibrio		1	6	5								1	0			5
Aeromonadales	Aeromonas		3	1	9							2	1			1			1
Pseudomonadales	Pseudomonaceae various									1		1	1	2					1
	Leminorella							1	2	1
	Azotobacter	1			1				1				1	0
	unclassified gamma			6				2	2	3		8		1 per 2, 5	1			1	1
	Pseudomonas	2	2	8	11	5	2	1	14	1	1	1	1	1 per 3, 2 per 2, 13	2	6	124	1	1	0
	Acinetobacter	5	4	4	10	9	3	1		1	1	1	1	1 per 2, 9		2	7	1		1
	Moracellaceae various			1		3		2	8	1	1	2		1			6
	Moraxella				5					1			1	0		1		1
Alteromonadales	Marinobacter				9							1	1	1 per 2, 2				1
	Moritella				4							1		1
Cellvibrionaales	Cellvibrio				7							1	1	0				1		1
	Haliea						1							1
	Alkanindiges									1		1
	Perlucidibaca									1		1		1
	Psychrobacter											1		0		1				1
	Idiomarina											1	1	2				1
Cardiobacteriales	Cardiobacter/ium											1		2						1
Alteromonadales	Alteromoadales various			3								8		1
	Alteromonas			1	9							1		2
	Pseudoalteromonas			1	10							1		0
	Thalassomonas			1								1
	Methylophaga			1	4
	Alcanivorax			1	6					1			1	0						0
	Halomonas		1	1	2							3		1				1
	Shewanella		1	2	1							1	1			1	4
Oceanospirillales	Marinomonas			1								1
	Amphritea			1								1
	Neptuniibacter			1								1
	Oceanospirillales various			1								10		2
Methylococcales	Methylomicrobium				4		1
	Methylocaldum						2					1
	Methylococcales various											2	1	2
Thiotrichales	Thiotrichales various				10					1			2	3		1	1
	Beggiatoa				7									2
	Thiothrix				10					1				1
Chromatiales	Rheinheimera				8							1					1
	Nitrosococcus				1						1	1	1
	Chromatiales various MQ											2		3					1
Legionellales	Legionella/aceae		14	3	1		7			5	1	5	1	2				1	1
	Aquicella%		10				1			1	1	1		1				1
	Coxiella				10			1	3	1		1	1	1 per 2, 2
	Rickettsiella	1			10					1		3		2		1
	Colwellia				7							2	1
	Piscirickettsia				10													1
	Francisella				9								1			1
Nevskiales	Rudaea		1							1	4			1
	Thermomonas													4				1
	Nevskia							1				1		3						1
	Steroidobacter											1		1 per 2, 1			3	1
Xanthomonadales	Xanthomonas				8	1				1		1	1	1 per 3, 1 per 2, 3	1					1
	Xantomonadaceae uncul.					2		2		1	5	4		1 per 3, 1 per 2	2		8		1
	Lysobacter		1			3	1					1		2 per 3, 1 per 2, 3	1
	Stenotrophomonas	1	1	2		3		1		1	1	1	1	1 per 3, 2 per 2, 1	1	1		1		2
	Rhodanobacter					20				2		1		2		1
	Luteibacter					1				1		1		0		1
	Pseudoxanthomonas				11					2		1		2		1		1		1
	Luteimonas											2		1		1		1
	Dyella									3	3	3		1				1
	Arenimonas											1		0				1
	Dokdonella											1		2				1
	Xylella											1	1					1
Salinisphaerales	Salinisphaeracea uncul.									1		1		1				1
unclassified	Incertae_Sedis, uncultured					11					7
Orbales	Gilliamella					19
Acidithiobacillales	Acidithiobacillus MQ				1									1
class, order, family		scorpion gut	prawn	6 tiger shrimp	10 ticks	honeybee egg, larvae	Drosophila	1 cockroach, gut, diff. diets	6 cockroaches gut	wood feeding cockroaches	2 cockroaches gut	termite gut, many	Atta ants and nests	ants 35 samples	7 ants only	lion ant whole body	16 fleas, 2 species	2 red palm beetle	herbivore beetles	contaminants of kits and reagents
beta	genus/taxon
Burkholderiales	Polynucleobacter		1	1	8								1	1
	Pandoraea	1								1	1	1		1
	Delftia	1	1		2	1		1	1	1		3	1	1	1	1		1		1
	Ralstonia	2	2	1	6	1	1			1		1	1	1 per 2, 1	1			1	1	1
	Acidovorax	1	1	1	3	2	1					3	1	1 per 2, 1	1	1				1
	Comamonas	1		1	3	1		1				3	1	3	1		1			1
	Burkholderia		2	2	8	2	2	2			5	4				1			1	2
	Cupriavidus		1	1			2			1	1	1		1 per 2, 2		1				1
	Polaromonas		2		4		1					1	1	2						1
	Burkholderiaceae uncul.									2		1		2 per 2,8	1	1			1	1
	Variovorax		1	1	1				2	1		2	1	1 per 2, 1				1	1	1
	Herbaspirillum			1			1				1	2		2					1	1
	Undibacterium			1				1		1	1	1		0						1
	Comamonadaceae uncul.			2					8	3		9		1 per 2	1		21		1	1
	Oxalobacteraceae uncul.			1				2	4			3		1			54		2
	Pelomonas			1		1	1	1		1		1		2						1
	Curvibacter			1			1							1 per 2, 1	1					1
	Rhodoferax				4		1					1	1	1 per 2, 2	1
	Herminiimonas				5					1				1	1
	Massilia					4				9		2		1 per 2, 3		1				1
	Derxia						1					1		2 per 3	1
	Aquabacterium						1					1				1
	Collimonas						1					1
	Ramlibacter						1			1		1		1 per 2				1	1
	Xenophilus								1	1		1		4		1		1
	Simplicispira										3	1		3
	Oxalobacter											1		1						1
	Ideonella											1		2
	Schlegelella											1		2
	Ottowia											1		0
	Caenimonas											1
	Rubrivivax MQ													0				1
	Janthinobacterium											1		2					1	0
	Leptothrix										1	1		2	1			1		1
	Diaphorobacter															1		1	1
	Alcaligenes											1		1 per 2, 2	1	1
	Bordetella				4					3		1	1	3
	beta unclassified			2				1	9	1		6		1 per 2, 2	2		2		2
	Alcaligenaceae uncul.			4				1	2	2		4		1 per 2					2
	Achromobacter	1		1				1		1		3		2	2	1		1
	Advenella/Tetrathiobacter	1							2	1
	Hydrogenophaga		1								1	1		2		1			1
	Limnobacter				2							1				1				1
	Methylibium				1		1					1	1	1 per 2, 4	1		1		1	1
Neisserales	Neisseria	1	1		6	1			1			2	1	2		1	1	1	1	1
	Kingella		1		1							1								0
	Neisserales uncul.					2				3		2		2		1	28
	Sutterellaceae								1					5			1			0
	Eikenella											0
	Lautropia													1	1				1
	Stenoxybacter										1	1
	Snodgrassella					5					3
Rhodocyclales	Thauera MQ				1									2
	Azoarcus				2			1		1	8	0	1	2						1
	Dechloromonas				3							2	1	1
	Sulfurisoma						1							1
	Rhodocyclaceae uncul.							3	18	3	8	8		1 per 2, 1
	Propionivibrio									1	8	1
	Azonexus MQ			1								1
	Methyloversatilis		1	1			1					2		0		1	1			1
	Zoogloea% RQ			1							1	1
	Azospira			1							1			0						1
Methylophilales	Methylotenera		3	1									1						1
	Methylophilus											1		3					1	1
	Methylophilaceae uncul.%											3		1		1	2
	Methylobacillus				6								1	4			1	1
	Denitratisoma						1					1		2 per 2
	Hydrogenophilus%						1							0				1
	Ferrovum						1							1	1
	Gallionella/aceae						1					1		0
Nitrosomonadales	Nitrosomonadaceae uncul.							1				3		1 per 3, 1 per 2
	Nitrosospira				4							1
	Nitrosomonas				7			1	1	1		1	1	0
	Thiobacillus				1							2		0
class, order, family		scorpion gut	prawn	6 tiger shrimp	10 ticks	honeybee egg, larvae	Drosophila	1 cockroach, gut, diff. diets	6 cockroaches gut	wood feeding cockroaches	2 cockroaches gut	termite gut, many	Atta ants and nests	ants 35 samples	7 ants only	lion ant whole body	16 fleas, 2 species	2 red palm beetle	herbivore beetles	contaminants of kits and reagents
delta	genus/taxon
Myxococcales	Cystobacter											1		2 per 2, 1
	Archangium											1		1
	Byssovorax%									1		1		2
	Haliangium									1		1	1	1
	Hyalangium						1					1		1 per 2
	Plesiocystis				2							1
	Stigmatella				3							1
	Sorangium				2					1		2	1	0
	Anaeromyxobacter				3					1		1	1	2
	Myxococcales uncul.			1					5	10	3	10	1	2 per 2, 1		1	11		1
Bdellovibrionales	Bdellovibrionles uncul.			1				1	1	1		3		2
	Bdellovibrio		5		2		4			1		1	1	2			4	1
	Bacteriovorax				1			1		1		2
	Peredibacter%							1	1	1		1
Desulfurellales	Desulfurellales uncul.											2		2
Desulfobacterales	Desulfobacter											1
	Desulfobacterium											2	1					1
	Desulfofustis										1			1
Desulfarculales	Desulfarculaceae uncul.									1	1	1
	Desulfarculus							1		1		1
	higher termite cluster%								4			2
Desulfuromonadales	Desulfuromonadales uncult.										3	5		1
	Pelobacteraceae											2	1	1
	Desulfuromonas				2		1			1		1
	Desulfobacula				1							1
	Geobacter				8		1					4	1					1
Desulfobacterales	Desulfotalea				5							1	1
	Desulfosalsimonas%						1	1
	Desulfobulbus							1	3	1	3	1		0
	Rs-K70 termite group							1	6		17	4
	Desulfobotulus%							1	3	1
	Desulfatiferula%							1	5	1
	Desulfosarcina							1	1	1	1	1
	Desulfobacteraceae uncul.			1				3		2	6	5	2	2		1	1
	Desulfobulbaceae uncul.			1					2			4		1
	Desulforegula						1					1		2
Syntrophobacterales	Smithella											1		1
	Desulfobacca											1		1
	Syntrophobacteraceae uncul.								1			5		2			1
	Syntrophobacter				4					2		2	1	1
Desulfovibrionales	Desulfovibrionaceae uncul.			1				1	5	6	6	3	2	1
	Desulfovibrio			3	9		2	3	1		13	7	1	1			1		1
unclassified	delta unclassified & uncul.				6		1	2		1		1		many		1		1
epsilon
Campylobacterales	Helicobacter				10								1	5	1
	Campylobacter				10								1	2	1			1
	Sulfurimonas				6							1		1
	Sulfurovum				5							1		1
	Wolinella				4								1	1
	Sulfurospirillum							1	3	1				1
	Arcobacter			1	6				6	1			1	1				1
unclassified	unclassified			1					2	1		6		5
	Nitratiruptor				8							1
Nautiliales	Caminibacter				6							3
